# Supplementary material for: Effects of the Newly Isolated T4-like Phage on Transmission of Plasmid-Borne Antibiotic Resistance Genes via Generalized Transduction
Source: MDPI journal article supplement (doi:10.3390/v13102070), 2021-10-14
Supplement: s1 [file viruses-1400745-supplementary.pdf › viruses-1400745-supplementary.pdf]

Supplementary Materials

# Effects of the Newly Isolated T4-like Phage on Transmission of Plasmid-Borne Antibiotic Resistance Genes via Generalized Transduction

**Table S1.** PCR primers used in this study.

| Gene                          | Primer Sequence (5'-3')                      | AS <sup>a</sup> | MT <sup>b</sup> | Plasmid Position |
|-------------------------------|----------------------------------------------|-----------------|-----------------|------------------|
| <i>floR</i>                   | F-CGATGCTCGCACTCCTAA<br>R-GGCAAAGCTGAATCCGAT | 224             | 55              | 85417-85640      |
| <i>sul2</i>                   | F-CGGTTGCGTTTGATACCG<br>R-ACGCAAGCCTATGCCTTG | 239             | 55              | 88906-89144      |
| <i>aph(4)-Ia</i>              | F-TTGTTGGAGCCGAAATCC<br>R-CCGATCTTAGCCAGACGA | 235             | 55              | 94679-94913      |
| <i>aac(3)-IV</i>              | F-AATCGACGCGTACCAACT<br>R-CACAGGCAGAGCAGATCA | 222             | 55              | 95745-95966      |
| <i>fosA3</i>                  | F-CCGTCAGGGTCGAGAAAA<br>R-TGGGATAGCGGAGCCTAT | 227             | 55              | 99011-99237      |
| <i>bla<sub>CTX-M-65</sub></i> | F-AGACGTTGCGTCAGCTTA<br>R-GCGGCTGGGTAAAATAGG | 237             | 55              | 102623-102859    |
| <i>aac(6')-Ib-cr</i>          | F-AATGCTGAATGGAGAGCC<br>R-GGTCCGTTTGATCTTGG  | 218             | 54.4            | 104207-104424    |
| <i>bla<sub>OXA-1</sub></i>    | F-GCCAGTGCATCAACAGAT<br>R-CCATTCCTTTGGGGGTTT | 241             | 55.6            | 104764-105004    |
| <i>catB3</i>                  | F-AATCAGGGGCATCGGTAC<br>R-CCGCCAACGATAGCGTAA | 239             | 57.8            | 105891-106129    |
| <i>arr3</i>                   | F-CGAGGACGGTCGTATTCT<br>R-CAAGGGTTCGCAGGTTCT | 214             | 55              | 106508-106721    |
| <i>sul1</i>                   | F-CTGCGCTCTATCCCGATA<br>R-TGCGGGGCTCAAGAAAAA | 224             | 55              | 107724-107947    |

The PCR procedure was as follows: initial 95 °C denaturation for 2 min followed by 35 cycles consisting of 95 °C for 10 s, annealing for 30 s at the melting temperatures shown above, and extension at 72 °C for 1 min and a final step at 72 °C for 10 min. <sup>a</sup>Amplicon size (bp). <sup>b</sup>Melting temperature (°C).

**Table S2.** BLAST results for pMD20-T:: ARG.

| Gene                          | Length(bp) | NCBI Acc. No | Match rate (%) |
|-------------------------------|------------|--------------|----------------|
| <i>floR</i>                   | 224        | CP047011     | 100%           |
| <i>sul2</i>                   | 239        | MW535748     | 100%           |
| <i>aph(4)-Ia</i>              | 235        | CP046417     | 100%           |
| <i>aac(3)-IV</i>              | 222        | CP046417     | 100%           |
| <i>fosA3</i>                  | 227        | CP047005     | 100%           |
| <i>bla<sub>CTX-M-65</sub></i> | 237        | MW052535     | 100%           |
| <i>aac(6')-Ib-cr</i>          | 218        | KJ568510     | 100%           |
| <i>bla<sub>OXA-1</sub></i>    | 241        | MW527089     | 100%           |
| <i>catB3</i>                  | 239        | CP054408     | 100%           |
| <i>arr3</i>                   | 214        | MW521224     | 100%           |
| <i>sul1</i>                   | 224        | MZ275239     | 100%           |

**Table S3.** Conditions and results of qPCR for 11 ARGs.

| Gene                          | qPCR conditions |                    |                              |                | Absolute abundance in pHNAH67 (copy number/ $\mu$ L) |
|-------------------------------|-----------------|--------------------|------------------------------|----------------|------------------------------------------------------|
|                               | MT <sup>a</sup> | Standard Curve     | Amplification Efficiency (%) | R <sup>2</sup> |                                                      |
| <i>floR</i>                   | 60              | C=-.135×q+41.743   | 108.4                        | 0.990          | 5.093 × 10 <sup>8</sup>                              |
| <i>sul2</i>                   | 60              | C=-3.584×Cq+42.318 | 90.1                         | 0.995          | 1.162 × 10 <sup>8</sup>                              |
| <i>aph(4)-Ia</i>              | 60              | C=-3.645×Cq+45.090 | 88.1                         | 0.990          | 4.015 × 10 <sup>8</sup>                              |
| <i>aac(3)-IV</i>              | 60              | C=-3.511×Cq+41.778 | 92.7                         | 0.998          | 5.385 × 10 <sup>8</sup>                              |
| <i>fosA3</i>                  | 60              | C=-3.553×Cq+39.757 | 91.2                         | 0.998          | 1.905 × 10 <sup>8</sup>                              |
| <i>bla<sub>CTX-M-65</sub></i> | 60              | C=-4.511×Cq+53.805 | 66.6                         | 0.994          | 2.378 × 10 <sup>8</sup>                              |
| <i>aac(6')-Ib-cr</i>          | 60              | C=-3.476×Cq+42.394 | 93.9                         | 0.994          | 3.958 × 10 <sup>4</sup>                              |
| <i>bla<sub>OXA-1</sub></i>    | 60              | C=-3.709×Cq+45.542 | 86.1                         | 0.991          | 2.826 × 10 <sup>4</sup>                              |
| <i>catB3</i>                  | 60              | C=-3.099×Cq+37.961 | 110.2                        | 0.994          | 6.052 × 10 <sup>3</sup>                              |
| <i>arr3</i>                   | 60              | C=-3.148×Cq+39.218 | 107.8                        | 0.991          | 3.943 × 10 <sup>3</sup>                              |
| <i>sul1</i>                   | 60              | C=-3.388×Cq+41.137 | 97.3                         | 0.993          | 2.160 × 10 <sup>8</sup>                              |

The qPCR procedure was as follows: initial 95 °C denaturation for 1 min, followed by 40 cycles consisting of denaturation 95 °C for 10 s, annealing for 5 s at melting temperature shown above with plate read, extension 72 °C for 15 s and a final melt curve step from 65 to 95 °C in increment of 0.5 °C for 5 s with plate read. The concentration of plasmid DNA was 49.1 ng/ $\mu$ L. <sup>a</sup>Melting temperature (°C).

**Table S4.** Results of amino acid sequence alignments of tail fiber, ribonucleotide reductase and holin between Enterobacteria phage T4 or RB3 and phage AH67C600\_Q9<sup>a</sup>.

| Amino acid sequence      | Gene Position on Phage AH67C600_Q9 Genome (bp) | Identity (%) |       |
|--------------------------|------------------------------------------------|--------------|-------|
|                          |                                                | T4           | RB3   |
| Tail fiber               | 70617–70859                                    | 97.50        | 94.67 |
|                          | 129359–129595                                  | 96.15        | 92.31 |
|                          | 145953–149822                                  | 95.50        | 92.55 |
|                          | 151683–154781                                  | 56.85        | 72.00 |
| Ribonucleotide reductase | 40154–40624                                    | 80.77        | 99.23 |
|                          | 135747–136925                                  | 86.84        | 85.71 |
|                          | 136979–139234                                  | 86.82        | 88.02 |
| Holin                    | 155373–156032                                  | 75.34        | 74.43 |

<sup>a</sup>Amino acid sequence alignments with identities <95%.

**Table S5.** Matching positions of contigs to ARGs for *E. coli* AH67C600.

| Gene                          | Plasmid Position | Reads Number | Contigs-Length   | BLAST Position |
|-------------------------------|------------------|--------------|------------------|----------------|
| <i>floR</i>                   | 84882–86095      | 32           | contig_941_655bp | 85314–85951    |
| <i>sul2</i>                   | 88599–89414      | 21           | contig_914_575bp | 88375–88949    |
| <i>aph(4)-Ia</i>              | 94261–95286      | 47           | contig_406_625bp | 94262–94808    |
| <i>aac(3)-IVa</i>             | 95507–96291      | 7            | ND <sup>a</sup>  | ND             |
| <i>fosA</i>                   | 98920–99336      | 21           | contig_41_903bp  | 98119–99021    |
| <i>bla<sub>CTX-M-65</sub></i> | 102052–102927    | 15           | ND               | ND             |
| <i>aac(6')Ib-cr</i>           | 103968–104567    | 0            | ND               | ND             |
| <i>bla<sub>OXA-47</sub></i>   | 104698–105528    | 4            | ND               | ND             |
| <i>catB3</i>                  | 105666–106298    | 0            | ND               | ND             |
| <i>ARR-3</i>                  | 106346–106835    | 0            | ND               | ND             |
| <i>sul1</i>                   | 107312–108238    | 12           | ND               | ND             |

<sup>a</sup>Not detected.

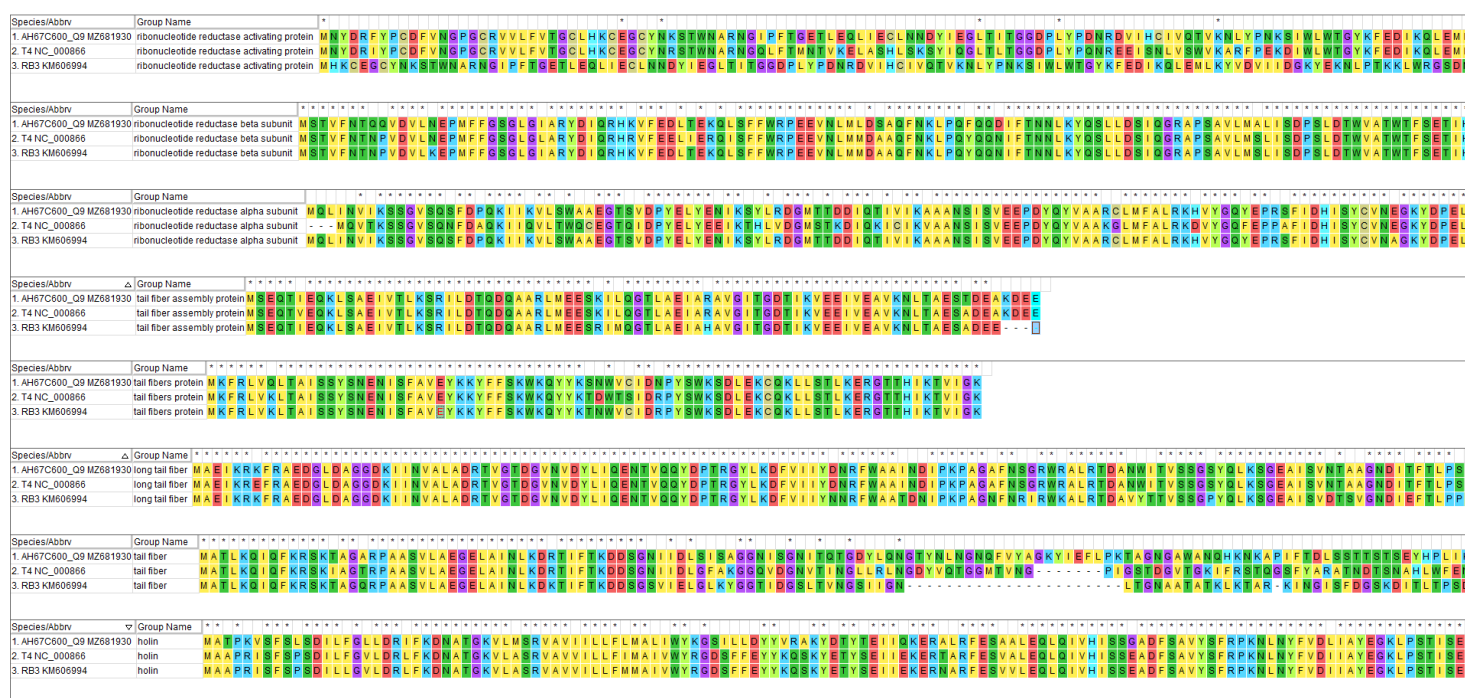

**Figure S1.** Amino acid sequence alignments of tail fiber, ribonucleotide reductase and holin between Enterobacteria phage T4 or RB3 and phage AH67C600\_Q9. This figure only shows the results of the amino acid sequence alignment identity are less than 95% (Table S4). At the same position in different sequences, amino acid differences were indicated by different colors, while the same color indicated the same or similar amino acids. The asterisk above indicated that the amino acid at this position is conserved.
